# Supplementary material for: N-doped carbon encapsulated ultrathin MoO3 nanosheets as superior anodes with high capacity and excellent rate capability for Li-ion batteries
Source: Royal Society of Chemistry journal article supplement (doi:10.1039/c5ta05924k), 2015-01-01
Supplement: c5ta05924k1.pdf [file c5ta05924k1.pdf]

## Supplementary Information

### **N-doped carbon encapsulated ultrathin MoO<sub>3</sub> nanosheets as superior anodes with high capacity and excellent rate capability for Li-ion batteries**

*Jiyicheng Qiu<sup>a</sup>, Zhanxu Yang<sup>a\*</sup>, Yue Li<sup>b</sup>*

<sup>a</sup> College of Chemistry, Chemical Engineering and Environment Engineering, Liaoning Shihua University, Fushun, Liaoning 113001, P. R. China.

<sup>b</sup> School of Foreign Languages, Liaoning Shihua University, Fushun, Liaoning 113001, P. R. China

\*Corresponding author: zhanxuy@126.com(Z. Yang).

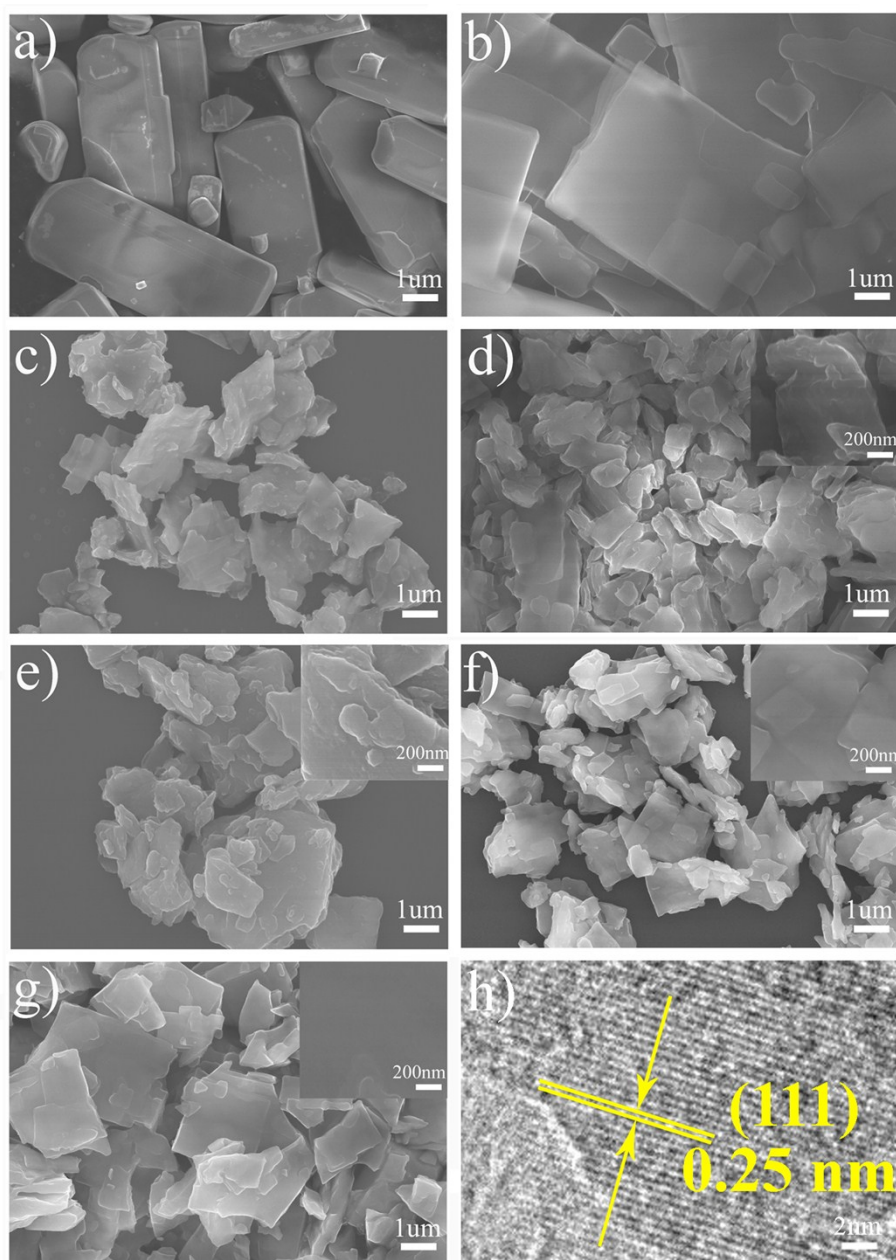

**Fig. S1** Typical SEM of (a)  $\alpha$ - $\text{MoO}_3$  and (b)  $\text{MoO}_3/\text{dodecylamine}$ . The SEM of (c) M-700, (d) M-200, (e) M-300, (f) M-400 and (g) M-500. (h) The HRTEM image of M-600.

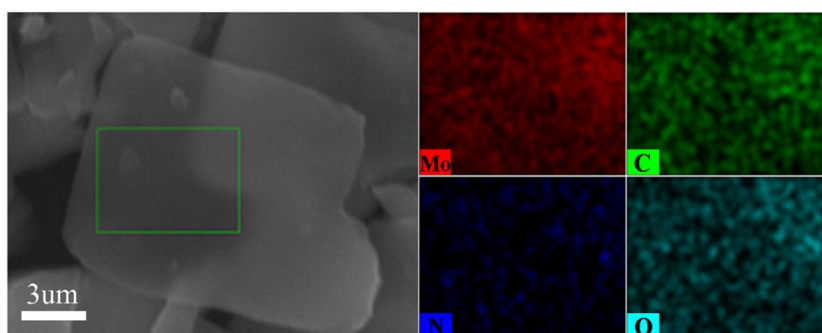

**Fig. S2** The local area magnification of elemental mapping from M-600 sample.

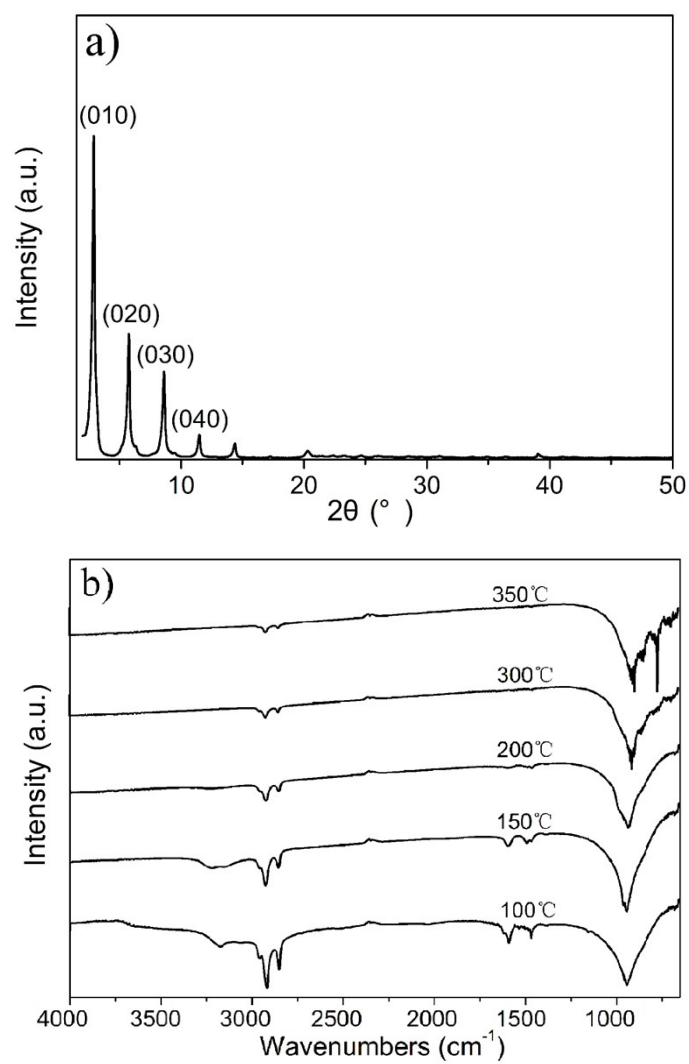

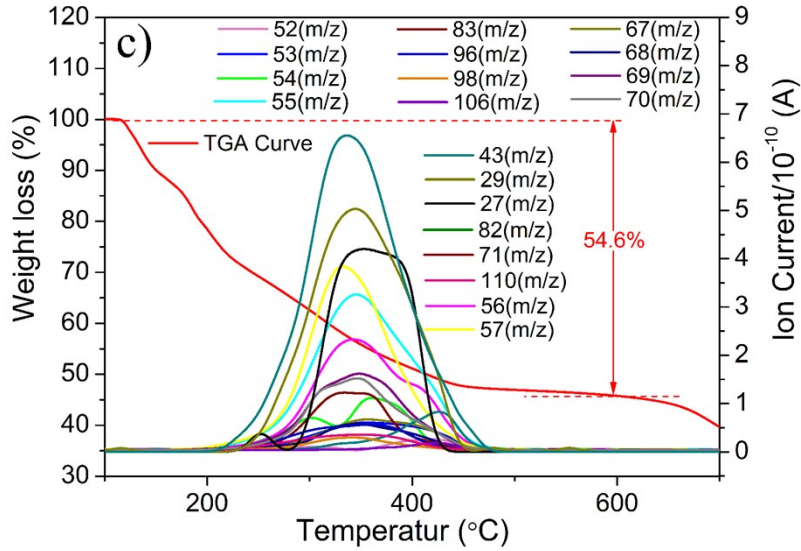

**Fig. S3** (a) XRD pattern of precursor MoO<sub>3</sub>/dodecylamine. (b) In-situ IR spectrum of composites at various annealing temperature (100~350 °C). (c) TG-MS combination analysis for the calcination of precursor MoO<sub>3</sub>/dodecylamine up to 700 °C in argon gas.

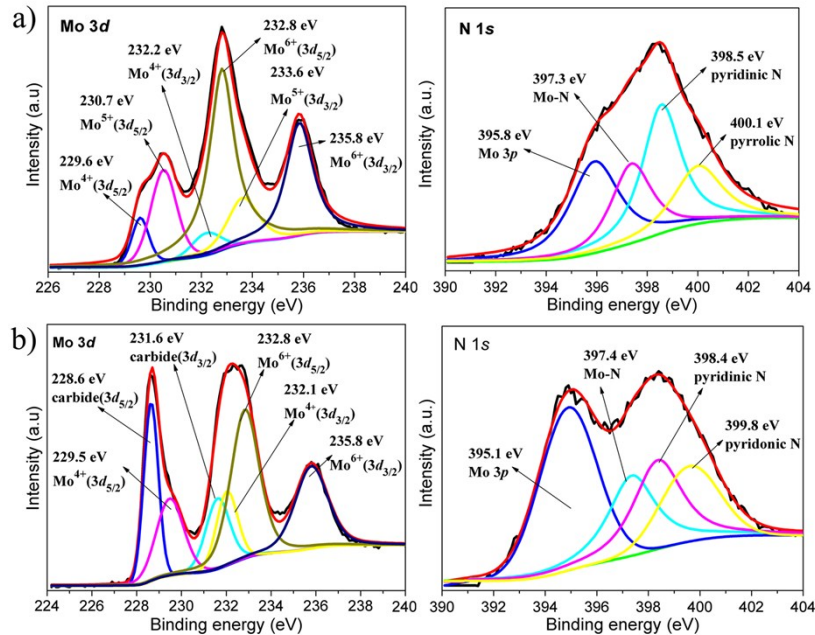

**Fig. S4** (a) XPS spectra of M-500 for Mo<sub>3d</sub> and N<sub>1s</sub>. (b) XPS spectra of M-700 for Mo<sub>3d</sub> and N<sub>1s</sub>.

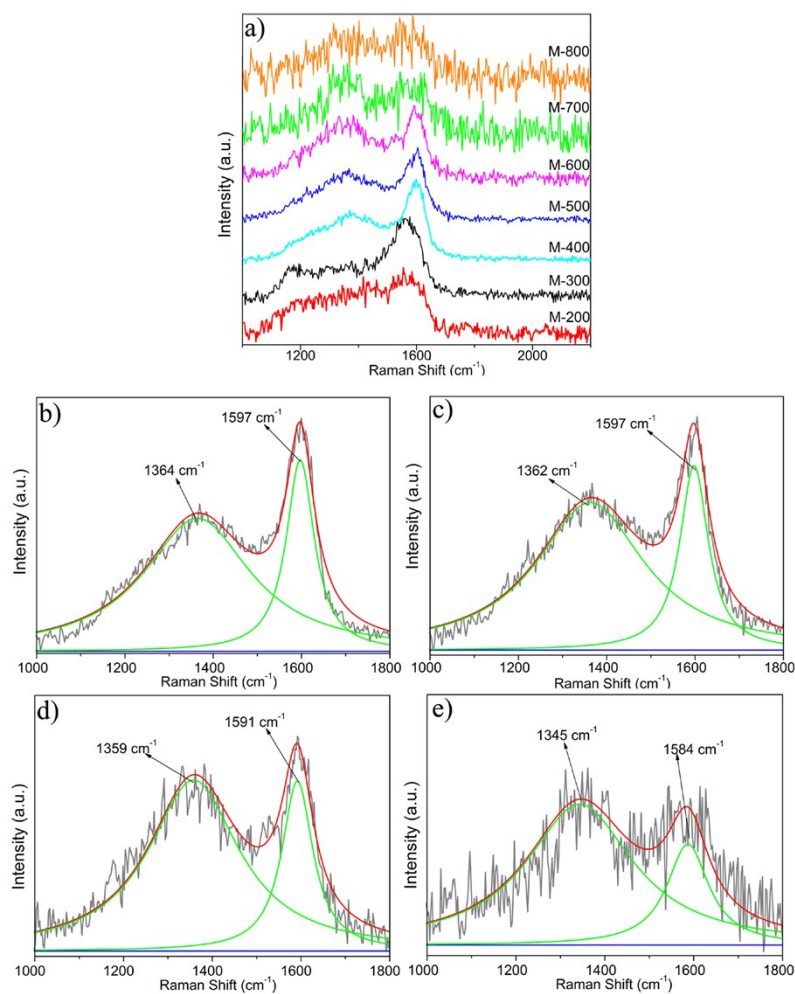

**Fig. S5** (a) Raman pattern of different composites after heating treatment at various temperature with a excitation wavelength of 532 nm. The fitted D and G peaks of M-400 (b), M-500 (c), M-600 (d) and M-700 (e).

**Table S1** Characteristics of the fitted D and G band for various composites

| Samples | D peak position<br>( $\text{cm}^{-1}$ ) | G peak position<br>( $\text{cm}^{-1}$ ) | FWHM of G<br>peak ( $\text{cm}^{-1}$ ) | $I_D/I_G$ |
|---------|-----------------------------------------|-----------------------------------------|----------------------------------------|-----------|
| M-400   | 1364                                    | 1597                                    | 77.1                                   | 0.69      |
| M-500   | 1362                                    | 1597                                    | 78.4                                   | 0.81      |
| M-600   | 1359                                    | 1591                                    | 80.1                                   | 1.01      |
| M-700   | 1345                                    | 1584                                    | 101.8                                  | 1.39      |

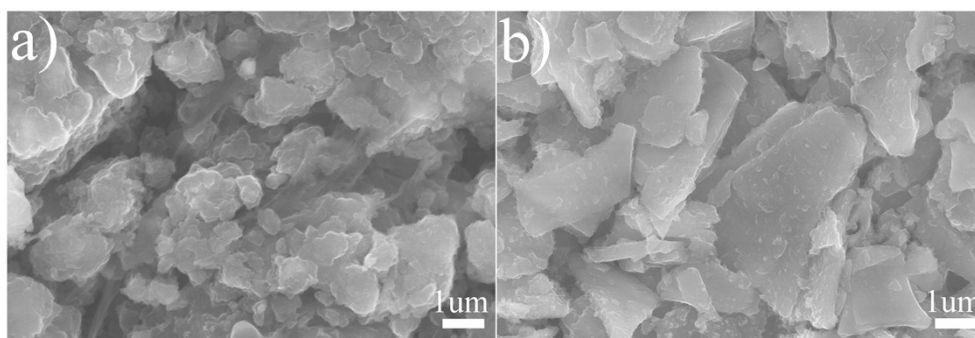

**Fig. S6** SEM images of (a)  $\text{MoO}_3$  electrode materials and (b) M-600 electrode materials after 60 cycles of charge-discharge at 1C.

**Table S2** Comparison for electrochemical properties of various MoO<sub>x</sub> materials

| Materials                             | Current rate                    | Specific capacity<br>(mAh g <sup>-1</sup> ) | Cycle number | Ref  |
|---------------------------------------|---------------------------------|---------------------------------------------|--------------|------|
| MoO <sub>2</sub> /graphene            | 0.2 C                           | 1100                                        | 50           | 1    |
| MoO <sub>3</sub> /MnO <sub>2</sub>    | 0.1 C                           | 1127                                        | 50           | 2    |
|                                       | 6 C                             | 286                                         | 50           |      |
| MoO <sub>3</sub> nanosphere           | 0.1 C                           | 1050                                        | 30           | 3    |
| MoO <sub>3</sub> film                 | 1 C                             | 650                                         | 50           | 4    |
| MoO <sub>2</sub> /C nanowires         | 1 A g <sup>-1</sup>             | 327                                         | 20           | 5    |
| MoO <sub>3</sub> microsphere          | 1 C                             | 780                                         | 100          | 6    |
| MoO <sub>3</sub> /C microballs        | 2 A g <sup>-1</sup>             | 733                                         | 300          | 7    |
| MoO <sub>3</sub> /C nanofiber         | 0.2 A g <sup>-1</sup>           | 500                                         | 100          | 8    |
| MoO <sub>3-x</sub> nanowire<br>arrays | 0.05 A g <sup>-1</sup>          | 630                                         | 20           | 9    |
| Core-shell MoO <sub>2</sub>           | 1 C                             | 624                                         | 50           | 10   |
| Mesoporous MoO <sub>2</sub>           | 0.05 C                          | 750                                         | 30           | 11   |
| MoO <sub>2</sub> /C nanosphere        | 3 C                             | 410                                         | 60           | 11   |
| MoO <sub>2</sub> /C nanobelts         | 0.1 A g <sup>-1</sup>           | 617                                         | 30           | 12   |
| MoO <sub>2</sub> /MWCNT               | 0.1 A g <sup>-1</sup>           | 1143                                        | 200          | 13   |
| MoO <sub>3</sub> @C                   | 1 A g <sup>-1</sup>             | 502                                         | 100          | 14   |
| MoO <sub>3</sub> @C                   | 0.1 C                           | 1064                                        | 50           | 15   |
| MoO <sub>3</sub> @C                   | 0.1 A g <sup>-1</sup>           | 500                                         | 100          | 16   |
| MoO <sub>3</sub> @C                   | 0.2 C                           | 700                                         | 120          | 17   |
| MoO <sub>3</sub> /NC                  | 6 C (6.2 A g <sup>-1</sup> )    | 605                                         | 150          | Our  |
| nanosheets                            | 0.3 C (0.46 A g <sup>-1</sup> ) | 1250                                        | 60           | work |

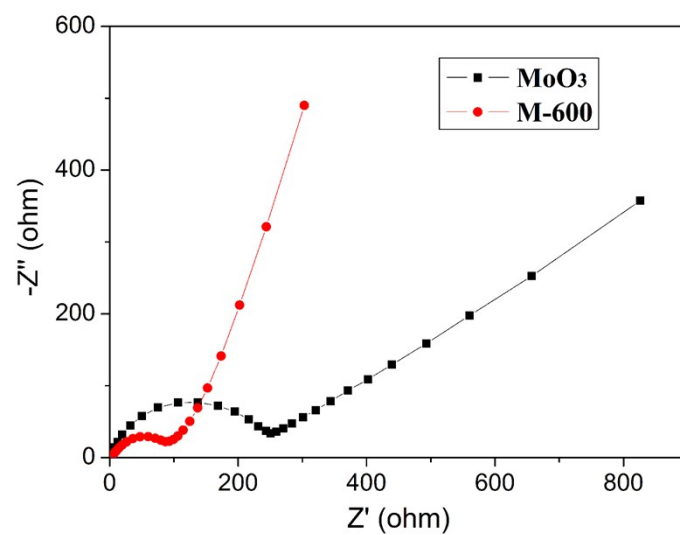

**Fig. S7** Nyquist plots of M-600 and MoO<sub>3</sub> over the frequency range from 100 kHz to 0.01 Hz at the discharged potential of 2.5 V after the 15th cycle.



## References

- 1 K. Palanisamy, Y. Kim, H. Kim, J. M. Kim, W. Yoon, Self-assembled porous MoO<sub>2</sub>/graphene microspheres towards high performance anodes for lithium ion batteries, *J. Power Sources*, 2015, **275**, 351.
- 2 Q. Wang, D. Zhang, Q. Wang, J. Sun, L. Xing, X. Xue, High electrochemical performances of  $\alpha$ -MoO<sub>3</sub>@MnO<sub>2</sub> core-shell nanorods as lithium-ion battery anodes, *Electrochim. Acta*, 2014, **146**, 411.
- 3 L. A. Riley, S. Lee, L. Gedvilias, A. C. Dillon, Optimization of MoO<sub>3</sub> nanoparticles as negative-electrode material in high-energy lithium ion batteries, *J. Power Sources*, 2010, **195**, 588.
- 4 X. Yu, L. Wang, J. Liu, X. Sun, Porous MoO<sub>3</sub> Film as a High-performance Anode Material for Lithium-Ion Batteries, *ChemElectroChem*, 2014, **1**, 1476.
- 5 Q. Gao, L. Yang, X. Lu, J. Mao, Y. Zhang, Y. Wu, Y. Tang, Synthesis, characterization and lithium-storage performance of MoO<sub>2</sub>/carbon hybrid nanowires, *J. Mater. Chem.*, 2010, **20**, 2807.
- 6 X. Zhao, M. Cao, C. Hu, Thermal oxidation synthesis hollow MoO<sub>3</sub> microspheres and their applications in lithium storage and gas-sensing, *Mater. Res. Bull.*, 2013, **48**, 2289.
- 7 Y. N. Ko, S. B. Park, K. Y. Jung, Y. C. Kang, One-Pot Facile Synthesis of Ant-Cave-Structured Metal Oxide-Carbon Microballs by Continuous Process for Use as Anode Materials in Li-Ion Batteries, *Nano Lett.*, 2013, **13**, 5462.
- 8 C. Feng, H. Gao, C. Zhang, Z. Guo, H. Liu, Synthesis and electrochemical

- properties of MoO<sub>3</sub>/C nanocomposite, *Electrochim. Acta*, 2013, **93**, 101.
- 9 P. Meduri, E. Clark, J. H. Kim, E. Dayalan, G. U. Sumanasekera, M. K. Sunkara, MoO<sub>3-x</sub> Nanowire Arrays As Stable and High-Capacity Anodes for Lithium Ion Batteries, *Nano Lett.*, 2012, **12**, 1784.
  - 10 X. Zhao, M. Cao, B. Liu, Y. Tian, C. Hu, Interconnected core-shell MoO<sub>2</sub> microcapsules with nanorod-assembled shells as high-performance lithium-ion battery anodes, *J. Mater. Chem.*, 2012, **22**, 13334.
  - 11 Y. Shi, B. Guo, S. A. Corr, Q. Shi, Y. Hu, K. R. Heier, L. Chen, R. Seshadri, G. D. Stucky, Ordered Mesoporous Metallic MoO<sub>2</sub> Materials with Highly Reversible Lithium Storage Capacity, *Nano Lett.*, 2009, **9**, 4215.
  - 12 L. Yang, L. Liu, Y. Zhu, X. Wang, Y. Wu, Preparation of carbon coated MoO<sub>2</sub> nanobelts and their high performance as anode materials for lithium ion batteries, *J. Mater. Chem.*, 2012, **22**, 13148.
  - 13 A. Bhaskar, M. Deepa, T. N. Rao, MoO<sub>2</sub>/Multiwalled Carbon Nanotubes (MWCNT) Hybrid for Use as a Li-Ion Battery Anode, *ACS Appl. Mater. Interfaces*, 2013, **5**, 2555.
  - 14 T. Tao, A. M. Glushenkou, C. Zhang, H. Zhang, D. Zhou, Z. Guo, H. K. Liu, Q. Chen, H. Hu, Y. Chen, MoO<sub>3</sub> nanoparticles dispersed uniformly in carbon matrix: a high capacity composite anode for Li-ion batteries, *J. Mater. Chem.*, 2011, **21**, 9350.
  - 15 M. F. Hassan, Z. P. Guo, Z. Chen, H. K. Liu, Carbon-coated MoO<sub>3</sub> nanobelts as anode materials for lithium-ion batteries, *J. Power Sources*, 2010, **195**, 2372.

- 16 Q. Xia, H. Zhao, Z. Du, J. Wang, T. Zhang, J. Wang, P. Lv, Synthesis and electrochemical properties of MoO<sub>3</sub>/C composites as anode material for lithium-ion batteries, *J. Power Sources*, 2013, **226**, 107.
- 17 X. Li, J. Xu, L. Mei, Z. Zhang, C. Cui, H. Liu, J. Ma, S. Dou, Electrospinning of crystalline MoO<sub>3</sub>@C nanofibers for high-rate lithium storage, *J. Mater. Chem. A*, 2015, **3**, 3257.
